# Supplementary material for: Do Physical Therapists Practice a Behavioral Medicine Approach? A Comparison of Perceived and Observed Practice Behaviors
Source: PubMed Central journal article supplement — Phys Ther. 2023 Mar 3;103(5):pzad025. doi: 10.1093/ptj/pzad025 (PMC10228382; doi:10.1093/ptj/pzad025), 2023-03-03
Supplement: appendix_1_(2)_pzad025.pdf [file appendix_1_%282%29_pzad025.pdf]

## Observation protocol

### A behavioural medicine approach in physiotherapy

| Focusing behaviours of importance for performing activities in daily life                                                                                    | Present/not present |
|--------------------------------------------------------------------------------------------------------------------------------------------------------------|---------------------|
| Discussing activities in daily life that the patient had difficulties performing due to pain                                                                 |                     |
| Assessment of target behaviour (asking, observing)                                                                                                           |                     |
| Applied skills acquisition (basic skills is merged and practised to form more complex behaviours in everyday life situations)                                |                     |
| Follow up of the target behaviour                                                                                                                            |                     |
| <b>The biopsychosocial focus in assessment</b>                                                                                                               |                     |
| Physical assessment (e.g. muscle strength, range of motion)                                                                                                  |                     |
| Psychological assessment (e.g. asking about or using questionnaires focusing on beliefs about the nature of pain, fear, pain catastrophizing, self-efficacy) |                     |
| Assessment of the physical and social environment (e.g. asking about/discussing/observing assistive devices, work place, support from family and friends)    |                     |
| <b>The biopsychosocial focus in treatment</b>                                                                                                                |                     |
| Physical skills                                                                                                                                              |                     |
| Cognitive skills                                                                                                                                             |                     |
| Organization of context                                                                                                                                      |                     |
| Agreement of a reasonable dosage of exercises                                                                                                                |                     |
| <b>Individual functional behavioural analysis</b>                                                                                                            |                     |
| Discussing causes and correlations between difficulties performing target behaviour and:                                                                     |                     |
| - physical factors                                                                                                                                           |                     |
| - psychological factors                                                                                                                                      |                     |
| - environmental factors (physical and social)                                                                                                                |                     |
| <b>Behaviour change techniques applied to physiotherapy</b>                                                                                                  |                     |
| Problem solving (of barriers for training)                                                                                                                   |                     |
| Relapse prevention                                                                                                                                           |                     |
| Self-monitoring of exercise                                                                                                                                  |                     |
| Encouraging and/or follow-up self-monitoring of target behaviour                                                                                             |                     |
| Discussing SMART goals                                                                                                                                       |                     |
| Self-reinforcement                                                                                                                                           |                     |
| Generalizations of target behaviour or skills                                                                                                                |                     |
| Shaping                                                                                                                                                      |                     |
| Fading out reinforcements and prompts/cues                                                                                                                   |                     |
| External reinforcement                                                                                                                                       |                     |
| Prompts/cues                                                                                                                                                 |                     |
